# Supplementary material
Source: publisher site journal article supplement (https://www.dovepress.com/article/321372)
Supplement: Supplementary file 1 [file get_supplementary_file.php]

**Supplementary Table 1.** Sequential symptoms and clinical profile of Covid-19-infected patients

| **At Presentation** | **At Admission (n=43)** | **Day 3 (n=39)** | **Day 7 (n=31)** | **Day 14 (n=6)** |
| --- | --- | --- | --- | --- |
| **Symptoms** | | | | |
| Fever | 23 (53.5%) | 7 (17.9%) | 2 of 30 (6.7%) | 1 (16.7%) |
| Respiratory | 5 (11.6%) | 3 (7.7%) | 2 (6.5%) | 1 (16.7%) |
| GIT | 3 (7.0%) | 3 (7.7%) | 2 of 30 (6.7%) | None |
| **COVID Stage** | | | | |
| Stage A | 14 (32.6%) | 27 (69.2) | 24 of 30 (80%) | 4 (66.7%) |
| Stage B | 27 (62.8%) | 10 (25.6%) | 4 of 30 (13.3%) | 1 (16.7%) |
| Stage C | 1 (2.3%) | 1 (2.6%) | 1 of 30 (3.3%) | None |
| Stage D | 1 (2.3%) | 1 (2.6%) | 1 of 30 (3.3%) | 1 (16.7%) |
| Stage E | None | None | None | None |
| Temperature (C), median(range) | 36.8 (36.2-39.8) | 36.8 (36.1-38.3) | 36.8 (36.0-38.8) | 36.9 (36.6-37.3) |
| **D-Dimer** | | | | |
| ≤ 0.5 | 19 (44.2%) | 10 of 24 (41.7%) | 5 of 11 (45.5%) | 1 of 4 (25.0%) |
| Above 0.5 | 24 (55.8%) | 14 of 24 (58.3%) | 6 of 11 (54.5%) | 3 of 4 (75.0%) |

Abbreviations: GIT, Gastrointestinal tract

**Supplementary Table 2.** Sequential laboratory and coagulation profile of COVID-19-infected patients

| **Hematological Parameters**  **n, mean*+*SD median (range)** | **At Admission** | **Day 3** | **Day 7** | **Day 14** |
| --- | --- | --- | --- | --- |
| WBC | 43, 7.5+4.3* | 32, 5.8+3.6* | 22,7.6+4.3 | 6, 8.1+4.7* |
|  | 7 (r=0.2–18.4) | 5.1 (r=0.8–15.9) | 6 (r=2–15.1) | 9.7 (r=1–12.6) |
|  |  |  |  |  |
| HgB | 43, 111.7+19.1* | 32, 105.2+20.5* | 22, 102.7+17.7* | 6, 76+36.1 |
|  | 115 (55–145) | 104.5(r=53–144) | 100.5 (r:76.0–143) | 89.5 (r=3.7–98) |
|  |  |  |  |  |
| Platelets | 43, 272.1+169.8 | 32, 243.2+134.8* | 22,264.7+179.9* | 6, 307+280.3* |
|  | 278 (r=3–892) | 264 (r=11–520) | 273.5 (r=10–627) | 267.0 (r=11–719) |
|  |  |  |  |  |
| Neutrophils | 42, 3.6+3.4 | 26, 2.3+2.1 | 18, 3.5+2.8 | 6, 5.2+4.2* |
|  | 2.2 (r=0.2–14.1) | 1.6 (r=0.1–7.9) | 2.4 (r=0.6–11) | 4.3 (r=1.1–11.7) |
|  |  |  |  |  |
| Lymphocytes | 41, 2.6+2 | 26, 2.6+2.2 | 19, 2.8+2.9 | 6, 2.3+1.6* |
|  | 1.9 (r=0.02–9.2) | 2.3 (r=0.02–8.8) | 1.9 (r=0.2–11.3) | 2.2 (r=0.1–4.4) |
|  |  |  |  |  |
| Monocytes | 41, 0.8+1 | 26, 0.5+0.3* | 19, 0.7+0.6 | 5, 0.8+0.4* |
|  | 0.7 (r=0.02–6.5) | 0.5 (r=0.04–1.3) | 0.7 (r=0.1-2.6) | 0.7 (r=0.4–1.4) |
|  |  |  |  |  |
| C-Reactive protein | 23, 27.3+64.8 | 17, 21+45.2 | 10, 33.4+63.5 | 3, 68.6+97.7* |
|  | 5.2 (r:0.2–297.8) | 6.2 (r=0.3–179.6) | 4.7 (r=0.2–180.5) | 24.9 (r=0.4–180.5) |
|  |  |  |  |  |
| Creatinine | 43, 32.8+16.1 | 31, 28+11* | 23, 28.9+10.5* | 6, 30.7+13.5* |
|  | 29.0 (r=3.8–79) | 25 (r=12–54) | 29.0 (r=12–49) | 31.0 (r=11–52) |
|  |  |  |  |  |
| INR | 43, 1.1+0.2 | 25, 1.1+0.1 | 12, 1.2+0.2 | 5, 1.1+0.1 |
|  | 1.1 (r=0.9–2) | 1.1 (r=0.9–1.4) | 1.1 (r=1–1.7) | 1.2 (r=0.9–1.2) |
| PT | 42, 15.5+2.2 | 25, 16.2+6.0 | 12, 19.1+9.4 | 5, 14.5+1.6* |
|  | 15.1 (12.4–26.2) | 15 (r=12.8–44.4) | 15.5 (r=14.2–47.8) | 14.9 (r=12.4–16.3) |
|  |  |  |  |  |
| PTT | 43, 40+6.8* | 25, 39.3+6* | 12, 42.5+5.9* | 5, 40.6+8* |
|  | 39.3 (26.6–59.5) | 37.8 (29.4–49.9) | 41.8 (34.9–53.6) | 43.6 (30.3–48.8) |
|  |  |  |  |  |
| D-Dimer | 43, 1.9+4.3 | 24, 1.9+4.1 | 11, 2.1+3.8 | 4, 5.4+6* |
|  | 0.5 (r=0.3–20) | 0.6 (r=0.3–20) | 0.5 (r=0.3–12.9) | 4.3 (r=0.4–12.9) |
|  |  |  |  |  |
| FIB | 37, 3.2+1.5 | 17, 3.2+2 | 8, 4.5+2.2* | 4, 4.5+2.4* |
|  | 3.1 (r=0.6–7.6) | 3.1 (r=0.6–7.8) | 4.4 (r=1.1–7.7) | 3.9 (r=2.5–7.7) |
|  |  |  |  |  |

* Normally distributed variable.

Abbreviations: GIT, Gastrointestinal tract; DIC, disseminate intravascular coagulopathy; INR, International normalized ratio; PT, Prothrombin time; HCT, Hematopoietic cell transplant.
